# Supplementary material
Source: publisher figshare collection journal article supplement (https://acs.figshare.com/ndownloader/files/11916536)
Supplement: Supplementary file 1 [file 11916536]

# Supporting Information

## Simultaneous Discrimination of Single-Base Mismatch and Full Match Using a Label-Free Single-Molecule Strategy

Qiufang Yang,<sup>†</sup> Tingting Ai,<sup>†</sup> You Lv,<sup>†</sup> Yuqin Huang,<sup>†</sup> Jia Geng,<sup>‡</sup> Dan Xiao,<sup>†</sup> and Cuisong Zhou<sup>\*,†</sup>

<sup>†</sup>College of Chemistry, Sichuan University, Chengdu 610064, P. R. China

<sup>‡</sup>Department of Laboratory Medicine, West China Hospital, Sichuan University and Collaborative Innovation Center, Chengdu 610041, P. R. China

**\*Corresponding Author: Cuisong Zhou**

College of Chemistry, Sichuan University

Chengdu 610064, P. R. China

E-mail: zcs@scu.edu.cn

### Contents

|                                                                                                     |    |
|-----------------------------------------------------------------------------------------------------|----|
| 1. Sequence information of molecular beacons and targets .....                                      | 2  |
| 2. Molecular configuration and characteristic current signature of molecular beacons and hybrids .. | 2  |
| 3. Target DNA translocation through the pore .....                                                  | 3  |
| 4. Single-channel current traces of molecular beacons and hybrids .....                             | 4  |
| 5. Effect of transmembrane voltage on the duration time of molecular beacons and hybrids .....      | 6  |
| 6. Nanopore thermodynamic analytical method .....                                                   | 7  |
| 7. Nanopore kinetic analytical method .....                                                         | 10 |
| 8. Specificity of molecular beacons for recognizing target .....                                    | 11 |
| References .....                                                                                    | 12 |

## 1. Sequence information of molecular beacons and targets

**Table S1.** Detailed sequence information for all oligonucleotides used in the nanopore study

| Name     | Sequence                                       | $\Delta G$<br>(kcal·mol <sup>-1</sup> ) | T <sub>m</sub><br>(°C) |
|----------|------------------------------------------------|-----------------------------------------|------------------------|
| MB3 (MB) | 5'-GAGTCCCGCCTGTGACATGCATTCTCAAAAAA-3'         | -1.12                                   | 40.3                   |
| MB5      | 5'-GCGAGTCCCGCCTGTGACATGCATTCTCGCAAAAAA-3'     | -4.56                                   | 59.3                   |
| MB7      | 5'-GCGCGAGTCCCGCCTGTGACATGCATTCTCGCGCAAAAAA-3' | -9.28                                   | 75.0                   |
| MB0      | 5'-TCCCGCCTGTGACATGCATTAAAAA-3'                |                                         |                        |
| T        | 5'-AATGCATGTCACAGGCGGGA -3'                    |                                         |                        |
| 1mT      | 5'-AATGCATGTACAGGCGGGA -3'                     |                                         |                        |
| 2mT      | 5'-AATGCAAGTCACACGCGGGA -3'                    |                                         |                        |

**Note:** Underline denotes base pairs in the stem. Red denotes mismatched bases.

## 2. Molecular configuration and characteristic current signature of molecular beacons and hybrids

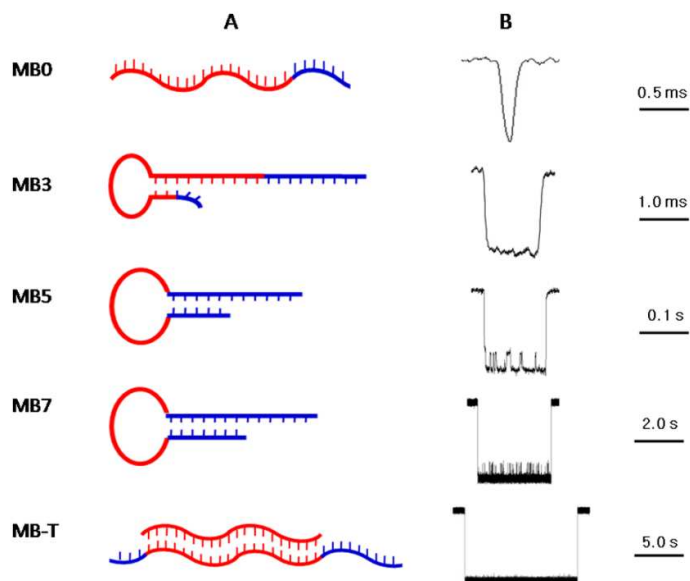

**Figure S1.** Molecular configuration(A) and characteristic current signature(B) of MB0, MB3, MB5, MB7 and MB-T in 1.0 M KCl (10 mM Tris and 1.0 mM EDTA, pH 8.0) solution at +120 mV.

### 3. Target DNA translocation through the pore

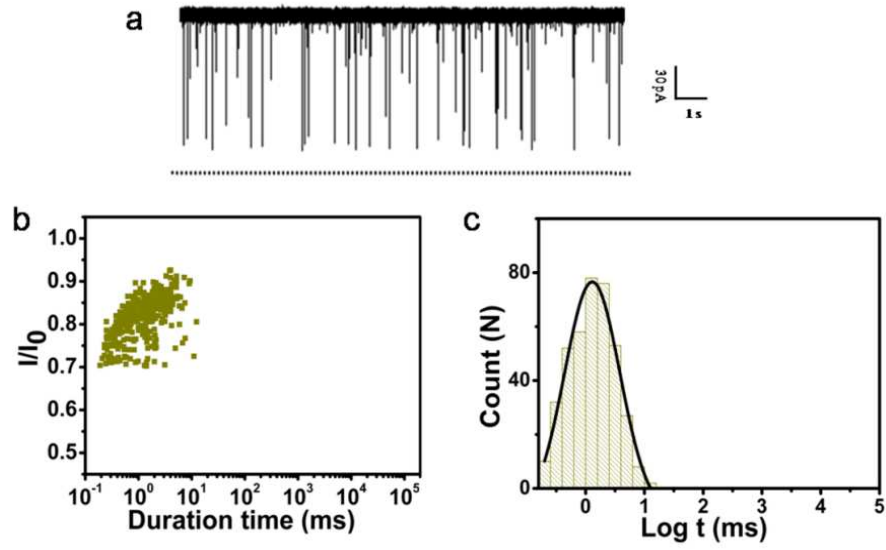

**Figure S2.** Translocation of the target DNA in the  $\alpha$ -HL protein nanopore. (a) Representative traces of the target DNA added into the *cis* side. Dashed lines represent the level of zero current. (b) The scatter plot of events blockage amplitude vs duration time. (c) The histogram of duration time (N=396). The data were recorded in 1.0 M KCl (10 mM Tris and 1.0 mM EDTA, pH 8.0) solution at +120 mV.

#### 4. Single-channel current traces of molecular beacons and hybrids

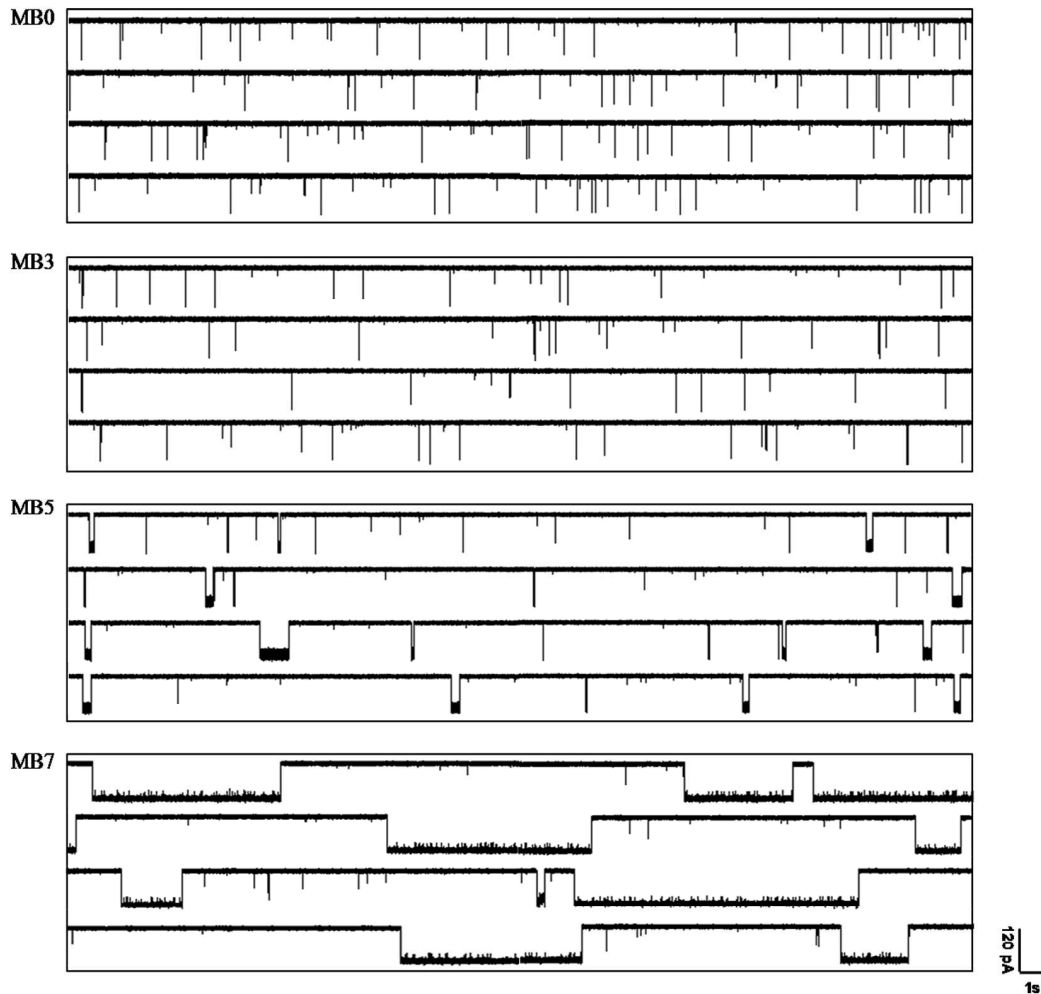

**Figure S3.** Single-channel current traces of MB0, MB3, MB5 and MB7. The data were recorded in 1.0 M KCl (10 mM Tris and 1.0 mM EDTA, pH 8.0) solution at +120 mV.

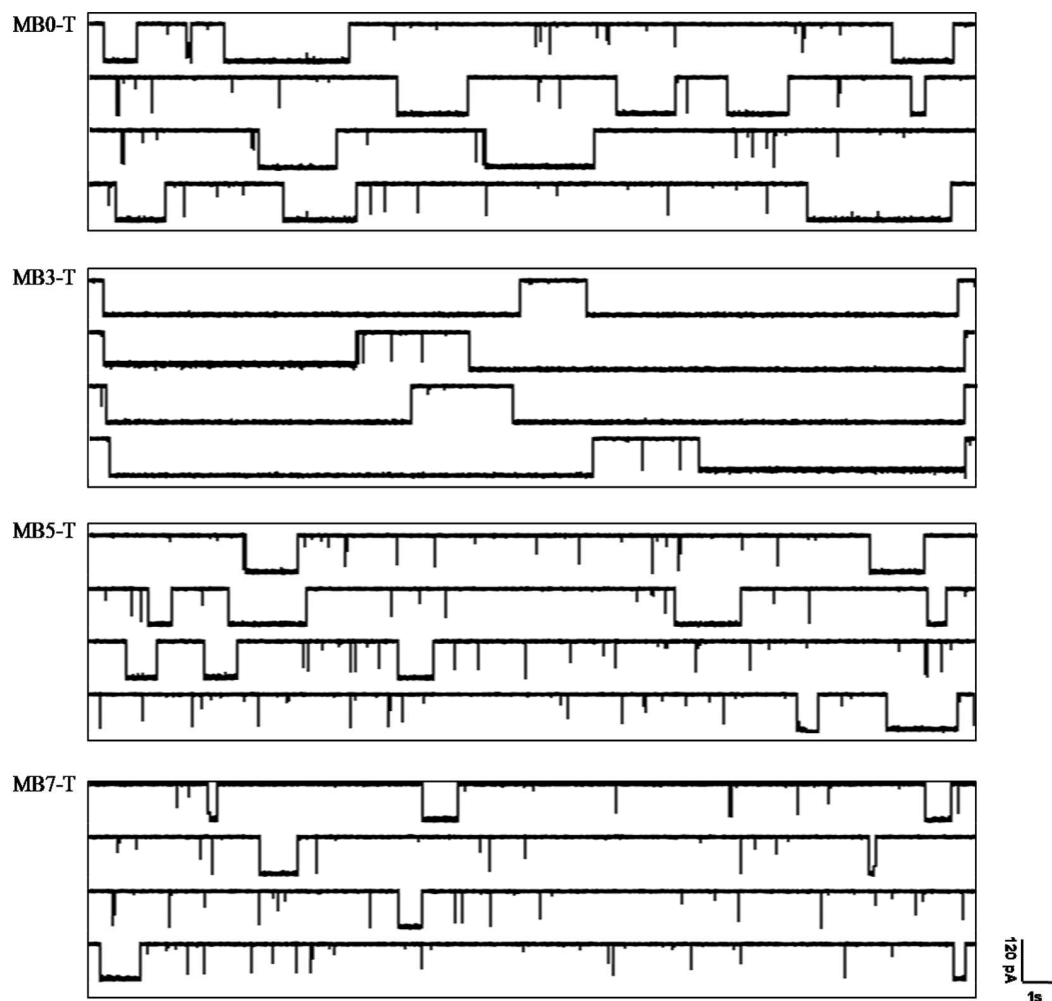

**Figure S4.** Single-channel current traces of MB0-T, MB3-T, MB5-T and MB7-T hybrids. The data were recorded in 1.0 M KCl (10 mM Tris and 1.0 mM EDTA, pH 8.0) solution at +120 mV.

## 5. Effect of transmembrane voltage on the duration time of molecular beacons and hybrids

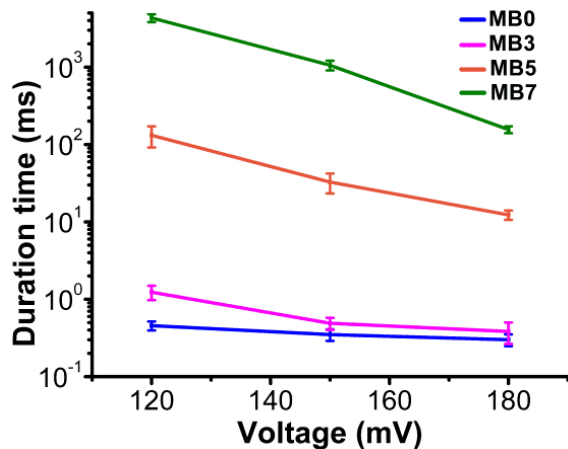

**Figure S5.** The histogram of duration time for MBs in the  $\alpha$ -HL nanopore in the absence of target at various applied potentials. The data were recorded in 1.0 M KCl (10 mM Tris and 1.0 mM EDTA, pH 8.0) solution.

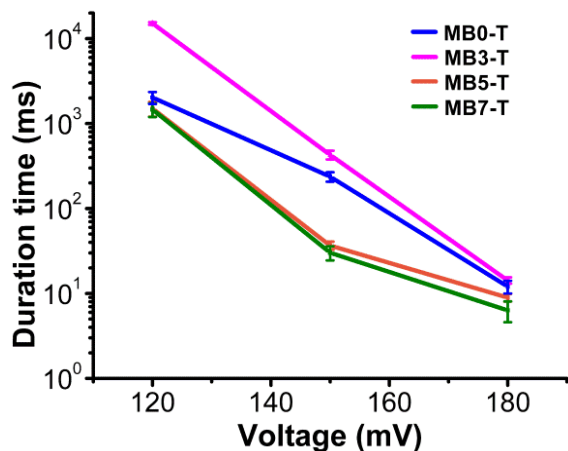

**Figure S6.** The histogram of duration time for the MB-T hybrids in the  $\alpha$ -HL nanopore in the presence of target at various applied potentials. The data were recorded in 1.0 M KCl (10 mM Tris and 1.0 mM EDTA, pH 8.0) solution.

## 6. Nanopore thermodynamic analytical method

The thermodynamic analysis is on the basis of the following binary complex formation mode:

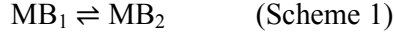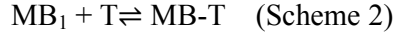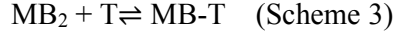

where MB, T and MB-T refers to molecular beacon, target DNA and molecular beacon-target duplex, respectively. “MB<sub>1</sub>” represents hairpin-like molecular beacon; “MB<sub>2</sub>” represents single-strand molecular beacon. The equilibrium dissociation constant  $K_1$  of Scheme 1 is determined by:

$$K_1 = \frac{[\text{MB}_2]}{[\text{MB}_1]} = \frac{[\text{MB}_2]_0}{[\text{MB}_1]_0} \quad (1)$$

where  $[\text{MB}_1]_0$  and  $[\text{MB}_2]_0$  are concentrations of hairpin-like molecular beacon and single-strand molecular beacon before the target is introduced in the solution, respectively;  $[\text{MB}_1]$  and  $[\text{MB}_2]$  is the concentration of hairpin-like molecular beacon and single-strand molecular beacon after the reaction reaches equilibrium state. The conversion ratio of single-strand molecular beacon to hairpin-like molecular beacon at equilibrium state is defined as  $k$  and calculated on the basis of the following equation:

$$k = \frac{N_{\text{MB}_1}}{N_{\text{total}}} = \frac{N_{\text{MB}_1}}{N_{\text{MB}_1} + N_{\text{MB}_2}} = \frac{[\text{MB}_1]_0}{[\text{MB}_1]_0 + [\text{MB}_2]_0} \quad (2)$$

where  $N_{\text{MB}_1}$  and  $N_{\text{MB}_2}$  are the number of current events of hairpin-like molecular beacon ( $t_{\text{off}} > 1$  ms) and single-strand molecular beacon ( $t_{\text{off}} < 1$  ms) before the target is introduced in the solution, respectively.  $N_{\text{total}}$  is the number of total events of molecular beacons. So the equilibrium dissociation constant  $K_1$  of Scheme 1 can be described by:

$$K_1 = \frac{1-k}{k} \quad (3)$$

Because the initial concentration  $C_0$  of molecular beacons is determined by:

$$C_0 = [\text{MB}]_0 = [\text{MB}_1]_0 + [\text{MB}_2]_0 \quad (4)$$

$$[\text{MB-T}]_1 + [\text{MB-T}]_2 = [\text{MB-T}] \quad (5)$$

where  $[\text{MB-T}]_1$  and  $[\text{MB-T}]_2$  are the concentration of duplex for scheme 2 and scheme 3, respectively, after the reaction reaches equilibrium state.

From Eq.1 and Eq.3,

$$[\text{MB}_1]_0 = kC_0 \quad (6) \quad [\text{MB}_2]_0 = (1-k)C_0$$

$$\frac{[\text{MB}_1]_0}{[\text{MB}_2]_0} = \frac{[\text{MB}_1]}{[\text{MB}_2]} = \frac{1}{K_1} = \frac{k}{1-k}$$

$$\frac{[\text{MB}_1]_0 - [\text{MB}_1]}{[\text{MB}_2]_0 - [\text{MB}_2]} = \frac{[\text{MB-T}]_1}{[\text{MB-T}]_2} = \frac{k}{1-k}$$

$$[\text{MB-T}]_1 = k[\text{MB-T}] \quad (7)$$

It is reported that the translocation frequency  $f$  ( $f=1/\tau_{on}$ ) for analytes is directly proportional to its concentration.<sup>1</sup> Then, the binding ratio of MB<sub>1</sub> at equilibrium state is defined as  $\Phi$  and calculated on the basis of the following equation:

$$\Phi = \frac{[\text{MB-T}]_1}{[\text{MB}_1]_0} = \frac{k[\text{MB-T}]}{[\text{MB}_1]_0} = k \frac{f_e}{f_0} \quad (8)$$

$f_e$  is the event frequency of MB-target after the reaction reaches equilibrium state, and  $f_0$  is the event frequency of hairpin-like molecular beacon before target is introduced in the solution. The average inter-event interval  $\tau_{on}$  can be directly obtained by data analysis of the current traces (Figure S7). Event number in each test is not less than 200.

Accordingly, the equilibrium constant  $K_a$  of target hybridizing with hairpin-like molecular beacons can be calculated using:

$$K_a = \frac{[\text{MB-T}]}{[\text{MB}_1][\text{T}]} = \frac{[\text{MB-T}]}{([\text{MB}_1]_0 - [\text{MB-T}]_1)([\text{T}]_0 - [\text{MB-T}])} = \frac{\Phi}{(1-\Phi)^2 k C_0} \quad (9)$$

Molecular beacon and target have the same initial concentration  $C_0$  of 200nM. The standard Gibbs free energy change can be described by:

$$\Delta G^0 = -RT \ln K_a \quad (10)$$

It is noteworthy that the stability of target hybridizing with hairpin molecular beacon was evaluated for MB3, MB5 and MB7. In contrast, the stability of target hybridizing with single-strand molecular beacon was evaluated for MB0. Therefore, when calculating  $\Phi$  and  $K_a$  of target hybridizing with single-strand molecular beacon of MB0, we substituted  $[\text{MB-T}]_2$ ,  $[\text{MB}_2]_0$  and  $[\text{MB}_2]$  for  $[\text{MB-T}]_1$ ,  $[\text{MB}_1]_0$  and  $[\text{MB}_1]$  in Eq.8 and Eq.9, respectively. Simultaneously, it is necessary to replace  $k$  in Eq.8 and Eq.9 with  $1-k$ .

**Table S2.** The results of the relevant parameters obtained from the nanopore experiments

|     | $f_0 [\text{s}^{-1}]$ | $f_e [\text{s}^{-1}]$ | $k$       | $\Phi$    | $K_a [\text{M}^{-1}]$     | $\Delta G^0 [\text{kcal} \cdot \text{M}^{-1}]$ |
|-----|-----------------------|-----------------------|-----------|-----------|---------------------------|------------------------------------------------|
| MB0 | 0.21±0.01             | 0.18±0.02             | 0.37±0.10 | 0.55±0.07 | 2.53±1.24×10 <sup>7</sup> | -9.94±0.27                                     |
| MB3 | 0.09±0.01             | 0.20±0.03             | 0.31±0.06 | 0.70±0.01 | 1.35±0.30×10 <sup>8</sup> | -10.98±0.13                                    |
| MB5 | 0.24±0.09             | 0.05±0.001            | 0.95±0.01 | 0.24±0.09 | 2.44±1.44×10 <sup>6</sup> | -8.52±0.39                                     |
| MB7 | 0.19±0.08             | 0.03±0.002            | 0.97±0.01 | 0.17±0.05 | 1.30±0.58×10 <sup>6</sup> | -8.19±0.29                                     |

Concentration of hybridization were 200 nM MB and 200 nM target. All tests were performed in buffer containing 1 M KCl, 10 mM Tris and 1.0 mM EDTA (pH=8.0) with the transmembrane potential of +120 mV. Error bars are standard deviations from three experiments.



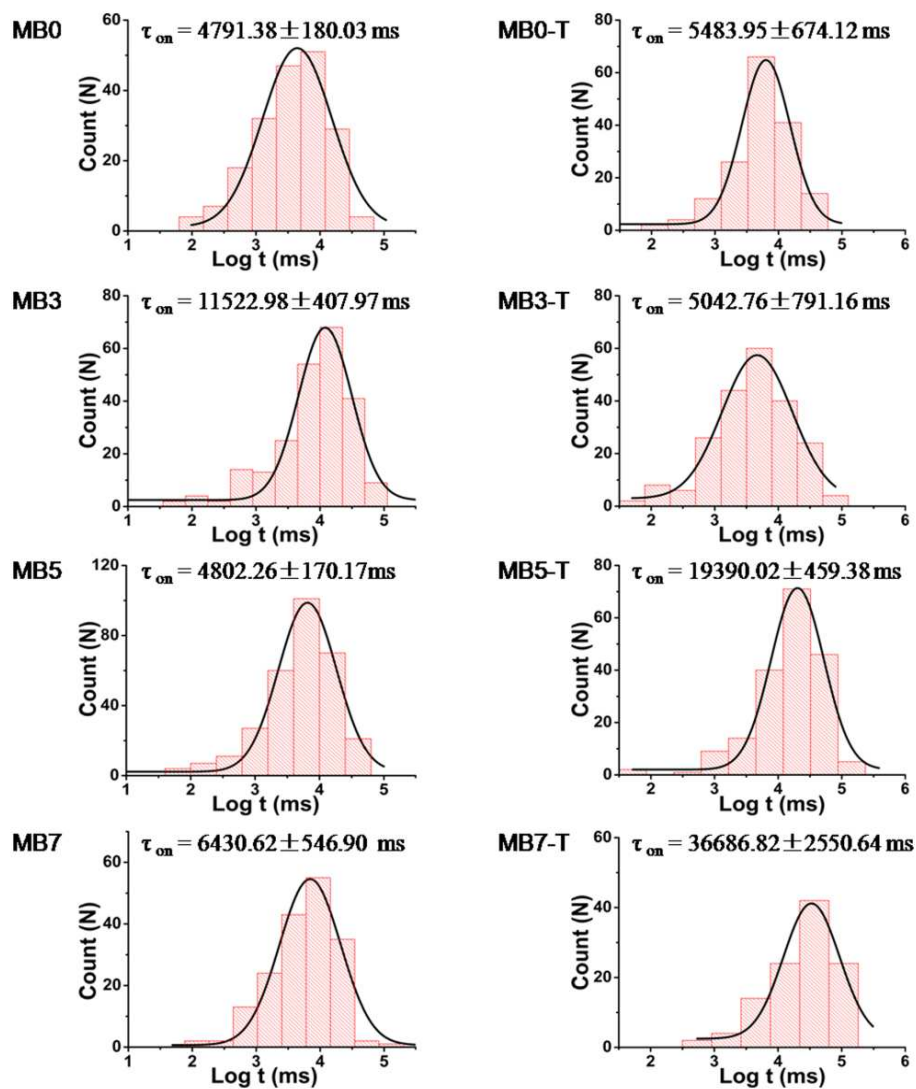

**Figure S7.** The histogram of inter-event interval  $\tau_{on}$  of the MB and MB-T passing the  $\alpha$ -HL nanopore. The number in each histogram is at least 200. The data were recorded in 1.0 M KCl (10 mM Tris and 1.0 mM EDTA, pH 8.0) solution at +120 mV.

## 7. Nanopore kinetic analytical method

The kinetic analysis is on the basis of the following binary complex formation mode:

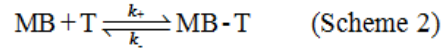

It is based on the assumptions that scheme 1 is in rapid equilibrium, that is, reaction 1 remains equilibrium state. It is assumed that the concentration of duplex MB-T is  $x$ . The hybridization rate  $r_+$  and dissociation rate  $r_-$  of Scheme 2 can be described by:

$$r_+ = k_+ [\text{MB}_1][\text{T}] = k_+ k (C_0 - x)^2 \quad (11)$$

$$r_- = k_- [\text{MB-T}] = k_- x \quad (12)$$

Where  $k_+$  is the hybridization rate constant and  $k_-$  is the dissociation rate constant. When the reaction reaches equilibrium state,

$$k_+ [\text{MB}_1][\text{T}] = k_- [\text{MB-T}] \Rightarrow k_+ = k_- K_a \quad (13)$$

The overall reaction rate of scheme 2 is:

$$r = \frac{d[\text{MB-T}]}{dt} = \frac{dx}{dt} = r_+ - r_- = k_- K_a k (C_0 - x)^2 - k_- x \quad (14)$$

Eq.15 can be obtained by integrating the Eq.14,

$$k_- K_a t = \frac{1}{2m} \ln \left| \frac{x-n-m}{x-n+m} \right| + C \quad (15) \quad m = \sqrt{\frac{1}{4k^2 K_a^2} + \frac{C_0}{k K_a}}, \quad n = C_0 + \frac{1}{2k K_a}$$

Where  $C$  is constant. When  $t=0$ ,  $x=0$ . Similarly, it is necessary to replace  $k$  with  $1-k$  in the calculation of  $m$  and  $n$  for MB0.

From Eq.15,

$$2m k_- K_a t = \ln \left| \frac{(x-n-m)(m-n)}{(x-n+m)(m+n)} \right| \quad (16)$$

The number of translocation events of MB-T during unit time is directly proportional to its concentration.

$$\frac{dN}{dt} = ax, \quad x = \frac{dN}{adt}$$

When the cumulative event number of MB-T hybrid translocation versus reaction time performed a linear relationship, the reaction reached equilibrium state. In this state,

$$x = \frac{[\text{MB-T}]_l}{k} = \frac{\Phi [\text{MB}_1]_0}{k} = \frac{\Phi k [\text{MB}]_0}{k} = \Phi [\text{MB}]_0$$

$$a = \frac{1}{\Phi [\text{MB}]_0} \left( \frac{dN}{dt} \right)_{\text{eq}}$$

For convenience, we defined  $Q$  as

$$Q = \frac{(x-n-m)(m-n)}{(x-n+m)(m+n)}$$

Thus,  $k_+$  can be obtained from plot of time vs.  $\ln Q$ .

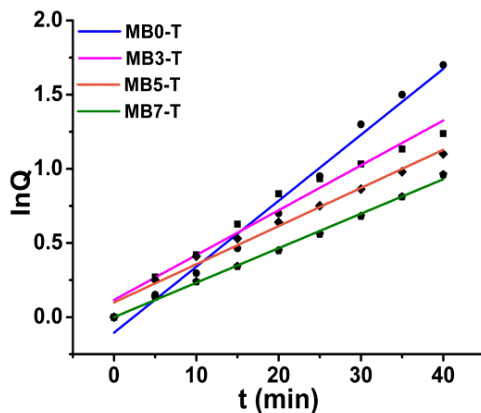

**Figure S8.** The plot of time (t/min) vs.  $\ln Q$ .

**Table S3.** The results of the relevant parameters obtained from the nanopore experiments.

|     | $(dN/dt)_{eq}$ | $\ln Q / t$ | $k_+[M^{-1} \cdot s^{-1}]$ |
|-----|----------------|-------------|----------------------------|
| MB0 | 2.84           | 0.045       | $1.93 \times 10^5$         |
| MB3 | 1.69           | 0.030       | $2.14 \times 10^5$         |
| MB5 | 1.21           | 0.026       | $3.57 \times 10^4$         |
| MB7 | 0.90           | 0.023       | $2.03 \times 10^4$         |

## 8. Specificity of molecular beacons for recognizing target

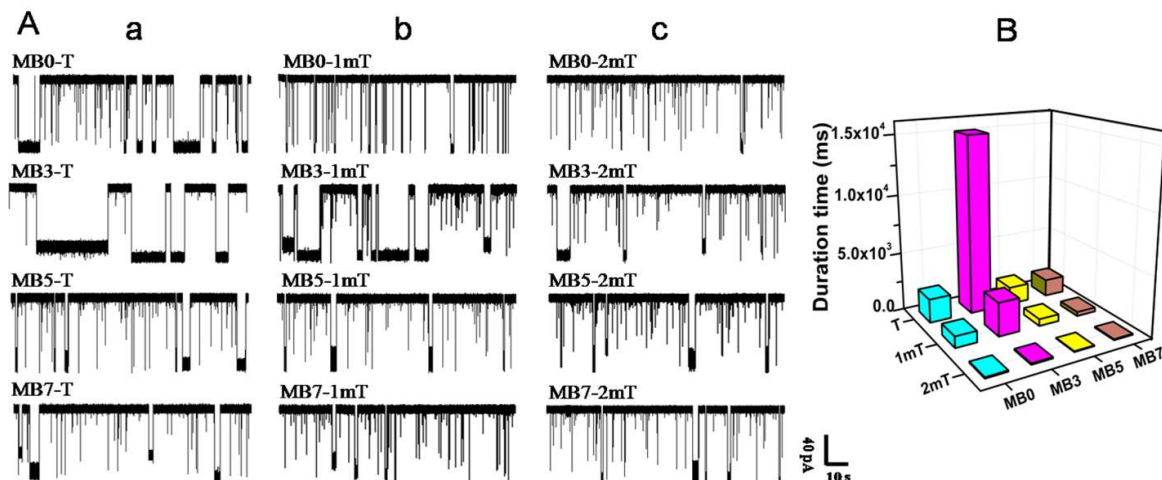

**Figure S9.** Specificity of MBs for recognizing target. (A) Single-channel current trace of MB-T (a), MB-1mT (b) and MB-2mT (c) passing through the nanopore. (B) Histograms of mean duration time of MB-T, MB-1mT and MB-2mT. The data were recorded in 1.0 M KCl (10 mM Tris and 1.0 mM EDTA, pH 8.0) solution at +120 mV.

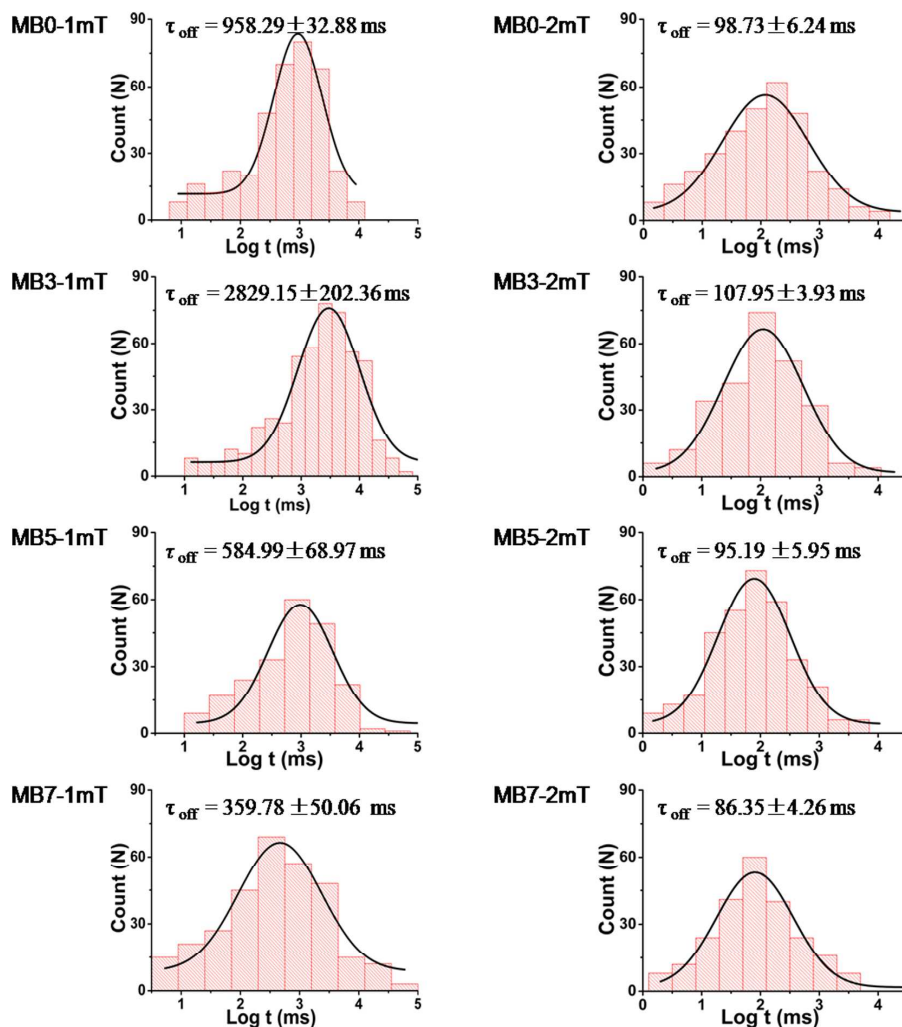

**Figure S10.** The histogram of duration time of the MB-1mT hybrids with single-base mismatch and MB-2mT hybrids with two-base mismatch passing the  $\alpha$ -HL nanopore. The number in each histogram is at least 200. The data were recorded in 1.0 M KCl (10 mM Tris and 1.0 mM EDTA, pH 8.0) solution at +120 mV.

## References

- (1) Zhang, L.; Zhang, K.; Rauf, S.; Dong, D.; Liu, Y.; Li, J. *Anal. Chem.* **2016**, 88, 4533-4540.
